# Supplementary material
Source: PubMed Central journal article supplement (PMC2346761)

# Supplemental Fig. 1

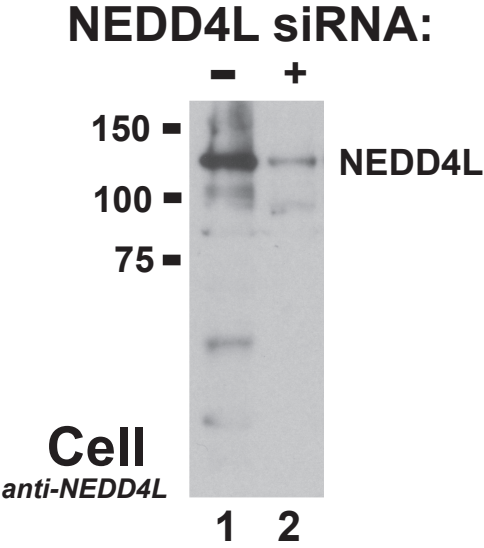

Supplement: jvirol_82_10_4884__1.pdf [file jvirol_82_10_4884__1.pdf]
